# Supplementary material for: Simple Topological Features Reflect Dynamics and Modularity in Protein Interaction Networks
Source: PLOS journal article supplement (doi:10.1371/journal.pcbi.1003243), 2013-10-10
Supplement: S38 (10.1371/journal.pcbi.1003243.s038) [file journal.pcbi.1003243.s038]

**Table S3. Spearman correlation of betweenness centrality with participation and functional similarity of hubs in the network.**

|                  | participation            | func. similarity         |
|------------------|--------------------------|--------------------------|
| <b>Human-hq</b>  | <b>0.83</b> ( $2e-123$ ) | <b>-0.62</b> ( $6e-52$ ) |
| <b>Yeast-hq</b>  | <b>0.60</b> ( $1e-44$ )  | <b>-0.43</b> ( $7e-22$ ) |
| <b>Fly</b>       | <b>0.62</b> ( $2e-92$ )  | <b>-0.09</b> ( $5e-03$ ) |
| <b>Athal</b>     | <b>0.51</b> ( $1e-38$ )  | <b>-0.09</b> ( $3e-02$ ) |
| <b>Ecoli</b>     | <b>0.39</b> ( $6e-13$ )  | 0.09 ( $1e-01$ )         |
| <b>Human-all</b> | <b>0.83</b> ( $1e-263$ ) | <b>-0.19</b> ( $2e-09$ ) |
| <b>Yeast-all</b> | <b>0.70</b> ( $1e-86$ )  | <b>-0.54</b> ( $9e-44$ ) |

All correlations except one are significant ( $p < 0.05$ ) and are shown in bold. See also Tables S1, S2 and S4.
