# Supplementary material for: Simple Topological Features Reflect Dynamics and Modularity in Protein Interaction Networks
Source: PLOS journal article supplement (doi:10.1371/journal.pcbi.1003243), 2013-10-10
Supplement: S39 (10.1371/journal.pcbi.1003243.s039) [file journal.pcbi.1003243.s039]

**Table S4. Spearman correlation of participation coefficient with functional similarity.**

|                  | func. similarity         |
|------------------|--------------------------|
| <b>Human-hq</b>  | <b>-0.65</b> ( $1e-58$ ) |
| <b>Yeast-hq</b>  | <b>-0.27</b> ( $4e-09$ ) |
| <b>Fly</b>       | <b>-0.21</b> ( $3e-10$ ) |
| <b>Athal</b>     | <b>-0.21</b> ( $4e-07$ ) |
| <b>Ecoli</b>     | -0.03 ( $6e-01$ )        |
| <b>Human-all</b> | <b>-0.27</b> ( $6e-19$ ) |
| <b>Yeast-all</b> | <b>-0.59</b> ( $3e-54$ ) |

All correlations except one are significant ( $p < 0.05$ ) and are shown in bold. See also Tables S1, S3 and S2.
