# Supplementary material for: Simple Topological Features Reflect Dynamics and Modularity in Protein Interaction Networks
Source: PLOS journal article supplement (doi:10.1371/journal.pcbi.1003243), 2013-10-10
Supplement: S40 (10.1371/journal.pcbi.1003243.s040) [file journal.pcbi.1003243.s040]

**Table S5. Spearman correlation for characteristics of orthologous hubs in Yeast-hq and Human-hq.**

| characteristic | $\rho$      | p-val   | empirical<br>p-val |
|----------------|-------------|---------|--------------------|
| avPCC          | <b>0.23</b> | 0.005   | 0.001              |
| clustering     | <b>0.62</b> | $7e-17$ | $< 0.001$          |
| betweenness    | <b>0.53</b> | $6e-12$ | $< 0.001$          |
| participation  | <b>0.58</b> | $2e-14$ | $< 0.001$          |
| func. sim      | <b>0.49</b> | $4e-10$ | $< 0.001$          |

Five hub characteristics for all 149 orthologous pairs between 109 hubs in **Yeast-hq** and 124 hubs in **Human-hq** are significantly positively correlated, as measured by Spearman’s rho ( $\rho$ ) and the correspondingly determined p-values and empirical p-values for 1000 random permutations of hubs. See main text and **Materials and methods** for details.
