# Supplementary material for: Simple Topological Features Reflect Dynamics and Modularity in Protein Interaction Networks
Source: PLOS journal article supplement (doi:10.1371/journal.pcbi.1003243), 2013-10-10
Supplement: S41 (10.1371/journal.pcbi.1003243.s041) [file journal.pcbi.1003243.s041]

**Table S6. Spearman correlation of avPCC for orthologs between species.**

| networks 1 and 2                  | $\rho$      | p-val   | empirical<br>p-val | #<br>or-<br>tho-<br>logs | #<br>hubs<br>org 1 | #<br>hubs<br>org 2 |
|-----------------------------------|-------------|---------|--------------------|--------------------------|--------------------|--------------------|
| <b>Athal</b> and <b>Fly</b>       | <b>0.38</b> | $2e-06$ | $< 0.001$          | 143                      | 99                 | 73                 |
| <b>Yeast-all</b> and <b>Athal</b> | <b>0.26</b> | 0.005   | 0.004              | 115                      | 48                 | 67                 |
| <b>Yeast-hq</b> and <b>Fly</b>    | <b>0.26</b> | 0.002   | 0.001              | 136                      | 100                | 117                |
| <b>Athal</b> and <b>Human-all</b> | 0.14        | 0.07    | 0.030              | 180                      | 90                 | 89                 |
| <b>Athal</b> and <b>Human-hq</b>  | 0.08        | 0.3     | 0.150              | 133                      | 79                 | 63                 |
| <b>Fly</b> and <b>Human-all</b>   | 0.02        | 0.7     | 0.362              | 316                      | 201                | 235                |
| <b>Yeast-all</b> and <b>Fly</b>   | -0.06       | 0.4     | 0.215              | 182                      | 139                | 134                |
| <b>Yeast-hq</b> and <b>Athal</b>  | -0.18       | 0.1     | 0.066              | 68                       | 39                 | 60                 |

avPCC correlation analysis for hubs in pairs of networks: Spearman's rho, corresponding p-value, empirical p-value for 1000 random permutations of avPCC among hubs, the number of orthologous pairs of hubs and the numbers of hubs in each organism involved into orthologs (only for hubs with assigned avPCC score). Correlations with absolute value above 0.1 and both p-values  $< 0.05$  are shown in bold. See main text and **Materials and methods** for details.
