# Supplementary material for: Simple Topological Features Reflect Dynamics and Modularity in Protein Interaction Networks
Source: PLOS journal article supplement (doi:10.1371/journal.pcbi.1003243), 2013-10-10
Supplement: S42 (10.1371/journal.pcbi.1003243.s042) [file journal.pcbi.1003243.s042]

**Table S7. Spearman correlation of clustering coefficient for orthologs between species.**

| networks 1 and 2                  | $\rho$      | p-val   | empirical<br>p-val |
|-----------------------------------|-------------|---------|--------------------|
| <b>Yeast-hq</b> and <b>Athal</b>  | <b>0.35</b> | 0.003   | < 0.001            |
| <b>Athal</b> and <b>Human-hq</b>  | <b>0.34</b> | $6e-05$ | 0.001              |
| <b>Fly</b> and <b>Human-all</b>   | <b>0.28</b> | $7e-07$ | < 0.001            |
| <b>Yeast-hq</b> and <b>Fly</b>    | <b>0.25</b> | 0.003   | 0.003              |
| <b>Athal</b> and <b>Human-all</b> | <b>0.23</b> | 0.002   | 0.001              |
| <b>Yeast-all</b> and <b>Athal</b> | <b>0.22</b> | 0.02    | 0.012              |
| <b>Yeast-all</b> and <b>Fly</b>   | <b>0.17</b> | 0.02    | 0.009              |
| <b>Athal</b> and <b>Fly</b>       | -0.03       | 0.7     | 0.343              |

Clustering coefficient correlation analysis for hubs in pairs of networks: Spearman’s rho, corresponding p-value, empirical p-value for 1000 random permutations of clustering coefficient values among hubs. Correlations with absolute value above 0.1 and both p-values < 0.05 are shown in bold. See main text and **Materials and methods** for details.
