# Supplementary material for: Simple Topological Features Reflect Dynamics and Modularity in Protein Interaction Networks
Source: PLOS journal article supplement (doi:10.1371/journal.pcbi.1003243), 2013-10-10
Supplement: S43 (10.1371/journal.pcbi.1003243.s043) [file journal.pcbi.1003243.s043]

**Table S8. Spearman correlation of betweenness centrality for orthologs between species.**

| networks 1 and 2                  | $\rho$      | p-val   | empirical<br>p-val |
|-----------------------------------|-------------|---------|--------------------|
| <b>Yeast-all</b> and <b>Athal</b> | <b>0.42</b> | $3e-06$ | $< 0.001$          |
| <b>Athal</b> and <b>Human-hq</b>  | <b>0.38</b> | $7e-06$ | $< 0.001$          |
| <b>Athal</b> and <b>Human-all</b> | <b>0.33</b> | $6e-06$ | $< 0.001$          |
| <b>Yeast-hq</b> and <b>Athal</b>  | <b>0.37</b> | 0.002   | 0.001              |
| <b>Fly</b> and <b>Human-all</b>   | <b>0.27</b> | $8e-07$ | $< 0.001$          |
| <b>Yeast-hq</b> and <b>Fly</b>    | <b>0.26</b> | 0.002   | 0.001              |
| <b>Yeast-all</b> and <b>Fly</b>   | 0.11        | 0.1     | 0.067              |
| <b>Athal</b> and <b>Fly</b>       | -0.00       | 1.0     | 0.493              |

Betweenness centrality correlation analysis for hubs in pairs of networks: Spearman's rho, corresponding p-value, empirical p-value for 1000 random permutations of betweenness centrality values among hubs. Correlations with absolute value above 0.1 and both p-values  $< 0.05$  are shown in bold. See main text and **Materials and methods** for details.
