# Supplementary material for: Simple Topological Features Reflect Dynamics and Modularity in Protein Interaction Networks
Source: PLOS journal article supplement (doi:10.1371/journal.pcbi.1003243), 2013-10-10
Supplement: S45 (10.1371/journal.pcbi.1003243.s045) [file journal.pcbi.1003243.s045]

**Table S10. Spearman correlation of functional similarity for orthologs between species.**

| networks 1 and 2                  | $\rho$      | p-val   | empirical<br>p-val |
|-----------------------------------|-------------|---------|--------------------|
| <b>Yeast-hq</b> and <b>Fly</b>    | <b>0.37</b> | $2e-05$ | $< 0.001$          |
| <b>Fly</b> and <b>Human-all</b>   | <b>0.25</b> | $8e-06$ | $< 0.001$          |
| <b>Athal</b> and <b>Fly</b>       | <b>0.24</b> | $4e-03$ | 0.004              |
| <b>Yeast-all</b> and <b>Athal</b> | <b>0.19</b> | 0.04    | 0.022              |
| <b>Yeast-all</b> and <b>Fly</b>   | 0.12        | 0.1     | 0.055              |
| <b>Athal</b> and <b>Human-all</b> | 0.05        | 0.5     | 0.211              |
| <b>Yeast-hq</b> and <b>Athal</b>  | -0.02       | 0.9     | 0.424              |
| <b>Athal</b> and <b>Human-hq</b>  | -0.06       | 0.5     | 0.260              |

Functional similarity correlation analysis for hubs in pairs of networks: Spearman's rho, corresponding p-value, empirical p-value for 1000 random permutations of functional similarity values among hubs. Correlations with absolute value above 0.1 and both p-values  $< 0.05$  are shown in bold. See main text and **Materials and methods** for details.
