# Supplementary material for: Simple Topological Features Reflect Dynamics and Modularity in Protein Interaction Networks
Source: PLOS journal article supplement (doi:10.1371/journal.pcbi.1003243), 2013-10-10
Supplement: S46 (10.1371/journal.pcbi.1003243.s046) [file journal.pcbi.1003243.s046]

**Table S11. Fraction of hubs annotated with GO terms in each network.**

| network          | BP | CC | MF | none |
|------------------|----|----|----|------|
| <b>Human-hq</b>  | 97 | 96 | 74 | 3    |
| <b>Yeast-hq</b>  | 92 | 96 | 71 | 2    |
| <b>Fly-hq</b>    | 68 | 63 | 66 | 21   |
| <b>Athal</b>     | 71 | 58 | 69 | 13   |
| <b>Ecoli</b>     | 48 | 39 | 49 | 35   |
| <b>Human-all</b> | 85 | 86 | 61 | 10   |
| <b>Yeast-all</b> | 94 | 98 | 79 | 0    |

For each network and for each ontology (Biological process, Cellular component, Molecular function), we show the percentage of hubs annotated with at least some terms other than the root (the most general) term in this ontology (BP, CC, MF), and the percentage of hubs not annotated in any of the three ontologies (none).
