# Supplementary material for: Simple Topological Features Reflect Dynamics and Modularity in Protein Interaction Networks
Source: PLOS journal article supplement (doi:10.1371/journal.pcbi.1003243), 2013-10-10
Supplement: S47 (10.1371/journal.pcbi.1003243.s047) [file journal.pcbi.1003243.s047]

**Table S12.** Interaction evidence types from different sources used for interaction annotation.

|                             | yeast two-hybrid                                                                                                                             | co-complex                                                                                                                                                                                                                                                                                                                                                                                                                             |
|-----------------------------|----------------------------------------------------------------------------------------------------------------------------------------------|----------------------------------------------------------------------------------------------------------------------------------------------------------------------------------------------------------------------------------------------------------------------------------------------------------------------------------------------------------------------------------------------------------------------------------------|
| BioGRID                     | Two-hybrid                                                                                                                                   | Affinity Capture-Luminescence<br>Affinity Capture-MS<br>Affinity Capture-RNA<br>Affinity Capture-Western<br>Co-purification<br>Reconstituted Complex                                                                                                                                                                                                                                                                                   |
| IntAct                      | two hybrid                                                                                                                                   | tandem affinity purification<br>pull down<br>anti tag coimmunoprecipitation<br>anti bait coimmunoprecipitation<br>affinity chromatography technology                                                                                                                                                                                                                                                                                   |
| Bossi and<br>Lehner<br>2009 | two_hybrid<br>-two_hybrid<br>two_hybrid_test<br>yeast<br>two_hybridarray<br>two_hybridpooling<br>sd4-two_hybrid<br>lacz4-two_hybrid<br>two_h | affinitycapture_ms<br>affin<br>gst_pulldown<br>affinity<br>mass_spectrometry<br>indirect_complex<br>reconstitutedcomplex<br>affinity_tag<br>affinity_chromatography<br>co_purification<br>direct_complex<br>copurification<br>affinity_c<br>affinity_chrom<br>tandem_affinitypurification<br>tap<br>literature_annotated_complex<br>affinity_techniques<br>affinity_co_purification<br>affinitycapture_western<br>affinit<br>pull_down |

Note that evidence types from [Bossi and Lehner, *Mol Sys Biol* 5:260 (2009)] are not organized in any formal vocabulary and were parsed from Column 3 of the table with interactions using symbols |, (, ), and : as punctuation.
